# Environmentally robust *cis*-regulatory changes underlie rapid climatic adaptation

Mallory A. Ballinger<sup>a,b,1,2</sup>, Katya L. Mack<sup>c,1</sup>, Sylvia M. Durkin<sup>a,b</sup>, Eric A. Riddell<sup>a,d</sup>, and Michael W. Nachman<sup>a,b,2</sup>

<sup>a</sup>Museum of Vertebrate Zoology, University of California, Berkeley, Berkeley, CA, 94720; <sup>b</sup>Department of Integrative Biology, University of California, Berkeley, Berkeley, CA, 94720; <sup>c</sup>Department of Biology, Stanford University, Stanford, CA, 94305; <sup>d</sup>Department of Ecology, Evolution, and Organismal Biology, Iowa State University, Ames, Iowa, 50011

1 **Changes in gene expression have been proposed to play a major role**  
2 **in adaptive evolution. However, gene expression is highly context-**  
3 **dependent and very few studies have determined the influence of**  
4 **genetic and non-genetic effects on adaptive gene regulation in natural**  
5 **populations. Here, we utilize context-dependent allele-specific expres-**  
6 **sion to characterize *cis* and *trans* changes underlying divergence in**  
7 **temperate and tropical house mice in two metabolic tissues under two**  
8 **thermal conditions. First, we show that gene expression divergence**  
9 **is pervasive between populations and across thermal conditions,**  
10 **with roughly 5-10% of genes exhibiting genotype-by-environment**  
11 **interactions. Second, we found that most intraspecific regulatory**  
12 **divergence was due to *cis*-regulatory changes that were stable across**  
13 **temperatures. In contrast, patterns of expression plasticity were**  
14 **largely attributable to *trans*-effects, which showed greater sensitiv-**  
15 **ity to temperature. Nonetheless, we discovered a small subset of**  
16 **temperature-dependent *cis*-regulatory changes, thereby identifying**  
17 **loci underlying expression plasticity. Finally, we performed scans for**  
18 **selection in wild house mice to identify genomic signatures of rapid**  
19 **adaptation. Genomic outliers were enriched in genes with evidence**  
20 **for *cis*-regulatory divergence. Strikingly, these genes were associated**  
21 **with phenotypes that affected body weight and metabolism, identify-**  
22 **ing *cis*-regulatory changes as a mechanism for adaptive body size**  
23 **evolution between populations. Together, these results support the**  
24 **central role of *cis*-regulatory divergence in adaptive evolution over**  
25 **extremely short timescales.**

adaptation | *cis*-regulatory evolution | plasticity-eQTL | *Mus*

1 A central goal in evolutionary biology is to understand how  
2 organisms adapt to novel environments. Gene regulation has  
3 long been recognized to play a major role in adaptive evolu-  
4 tion (1, 2), especially across short evolutionary timescales  
5 (e.g., refs. 3, 4). Yet, we still have a poor understanding of  
6 how changes in regulatory architecture shape adaptive evolu-  
7 tion. *Cis*-regulatory elements (e.g. promoters, enhancers) are  
8 predicted to be the primary substrate of adaptive evolution as  
9 they tend to be less pleiotropic than protein-coding changes  
10 (5–8). However, selection may favor divergence through *trans*-  
11 acting mechanisms (e.g., transcription factors), particularly  
12 when *trans*-effects modulate gene regulatory networks that  
13 are beneficial in new environments (9, 10). *Trans*-effects may  
14 also play a significant role in plastic changes in gene expres-  
15 sion (11–13), and selection on genetic variation underlying  
16 plasticity may facilitate adaptation to new environments (14,  
17 15). However, determining the relative importance of *cis*- and  
18 *trans*-changes to adaptation is challenging given that gene reg-  
19 ulation is highly dependent on the environment, tissue-type,  
20 sex, and developmental stage (16–21). In most studies, reg-  
21 ulatory patterns are often quantified under a single context,  
22 limiting our understanding of how gene regulatory architecture  
23 shapes adaptive evolution in natural populations.

24 The recent expansion of house mice into the Americas  
25 provides an opportunity to address the role of gene regula-  
26 tory changes in adaptive evolution. Since their arrival from  
27 Western Europe ~500 years ago, house mice (*Mus musculus*  
28 *domesticus*) have rapidly adapted to various climatic extremes  
29 through changes in morphology, physiology, and behavior (22–  
30 26). One striking example of this is changes in body size, as  
31 mice from more northern populations are significantly larger  
32 than mice closer to the equator, likely reflecting adaptation  
33 to thermal environments (26). Previous studies point to an  
34 important role for gene regulation in driving this local adap-  
35 tation. First, genomic scans have primarily identified positive  
36 selection on noncoding regions (23, 24), which have been linked  
37 to differences in gene expression (24, 27). Second, changes in  
38 *cis*-regulation at specific loci have been associated with varia-  
39 tion in body weight in North American mice (27). Finally,  
40 gene expression plasticity has been shown to differ between  
41 populations in response to environmental stressors (25), sug-  
42 gesting a role for context-specific regulatory divergence in local  
43 adaptation.

44 Here, we investigate the role of gene regulation in adap-  
45 tation in house mice from contrasting thermal environments.  
46 Specifically, using RNA-seq data collected from liver and brown  
47 adipose tissue in males and females, we measured gene expres-  
48 sion in temperate and tropical mice and in their F1 hybrids  
49 when reared under warm and cold temperatures. This al-  
50 lowed us to describe the proportion of divergently expressed

## Significance Statement

Little is known about the relative contributions of genetic versus environmental factors to gene expression variation in natural populations. Here, we discovered that genetic effects were far more pervasive than environmental effects on gene expression differences between house mice that have rapidly adapted to new environments. Notably, many of these genetic effects are under selection and underlie adaptive body size differences between populations. However, we also identified a few genes controlling plastic expression across different environments. Our study is one of the few to identify loci associated with plasticity in natural populations and supports the central role of genetic effects in the form of *cis*-regulatory divergence in adaptive evolution over extremely short timescales (a few hundred generations).

M.A.B. and M.W.N. designed research. M.A.B., S.M.D., and E.A.R. performed research. M.A.B. and K.L.M. analyzed data. M.A.B., K.L.M., and M.W.N. wrote the paper.

The authors declare no conflict of interest.

<sup>1</sup> M.A.B. and K.L.M. contributed equally to this work.

<sup>2</sup> To whom correspondence should be addressed. M.A.B., [mallory.ballinger@berkeley.edu](mailto:mallory.ballinger@berkeley.edu); M.W.N., [mnachman@berkeley.edu](mailto:mnachman@berkeley.edu)

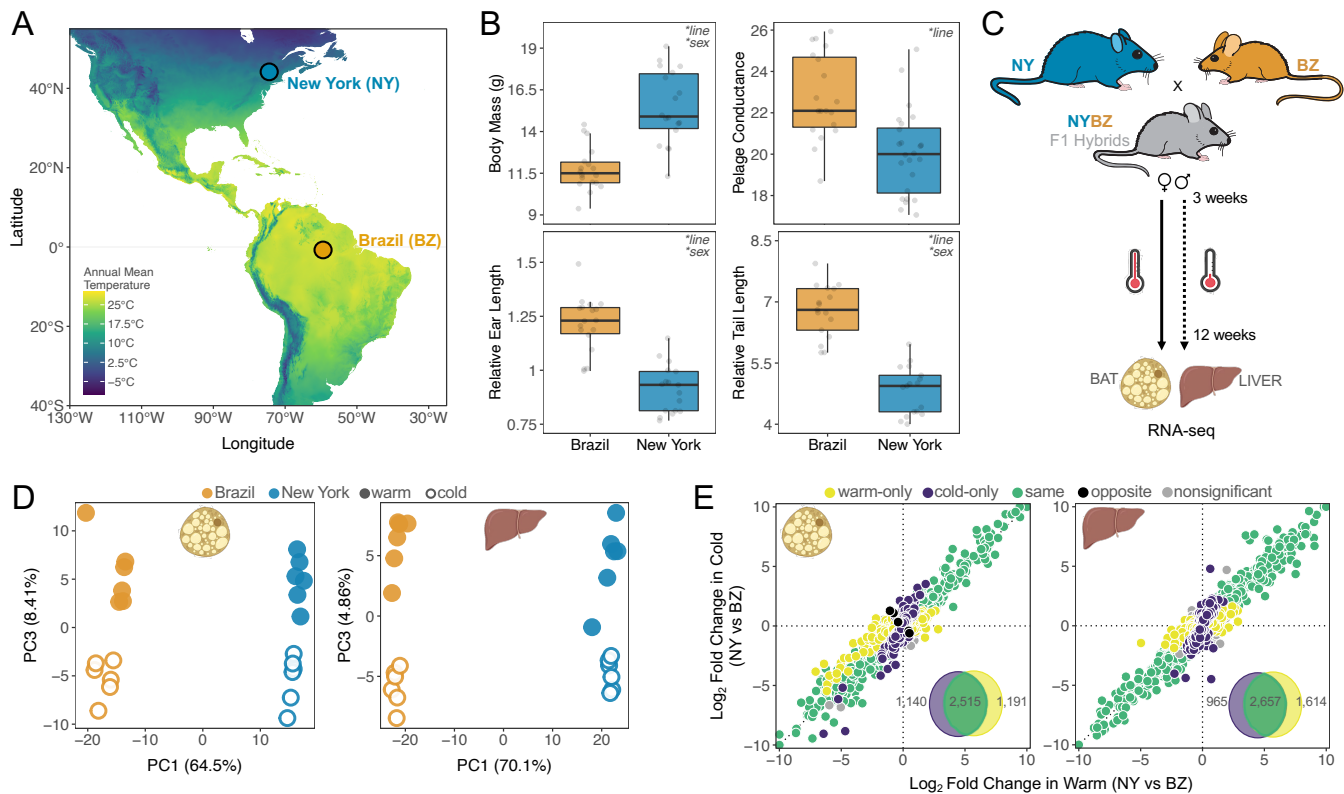

**Fig. 1. Evolved differences in phenotypes and gene expression.** (A) Variation in mean annual temperature across North and South America. Wild-caught individuals were collected in upstate New York (43°N) and equatorial Brazil (3°S). (B) Genetic differences in body mass (g), pelage conductance ( $W^{-1}m^2C^{-1}$ ), tail length (mm), and ear length (mm) between New York and Brazil. Tail length and ear length are plotted relative to body mass for each individual. Individuals are represented as individual points, and boxplots indicate the 25th, median, and 75th quartiles. Results from linear mixed models are presented in upper right corners ( $^*P < 0.05$ ; Table S1). Males and females show similar patterns and are combined for plotting simplicity. (C) Common garden experimental design. Individuals were reared under two temperatures from weaning until adults. (D) Principal component plots for PC1 vs PC3 based on male gene expression in BAT and liver. PC1 separates individuals based on genotype while PC3 reflects environmental differences. (E) Expression divergence between New York and Brazil males in warm and cold for both BAT and liver. Log<sub>2</sub> fold changes between parents were calculated for all genes independently. In each panel, points (representing individual genes) are colored depending on their direction and significance of the log<sub>2</sub> fold change. Insets depict the total number of differentially expressed genes for each comparison (FDR < 0.05). Females show similar patterns and are depicted in Figures S2-S3.

51 genes that are due to changes in *cis*, *trans*, or both, and to  
 52 determine the degree to which *cis*- and *trans*-regulation is  
 53 context-dependent. Finally, we performed scans for selection  
 54 in wild populations of house mice to identify genomic signa-  
 55 tures of adaptation. We then intersect these genomic outliers  
 56 with genes exhibiting *cis*-regulatory divergence to identify  
 57 putatively adaptive *cis*-regulatory mutations associated with  
 58 local adaptation. Our results provide insight into how gene  
 59 expression is regulated across multiple contexts and how this  
 60 complex regulatory divergence within species may contribute  
 61 to adaptive evolution.

## 62 Results

63 **Extensive gene expression divergence between temperate**  
 64 **and tropical house mice.** To characterize the regulatory archi-  
 65 tecture of adaptation, we first examined gene expression  
 66 differences in mice from two drastically different environments  
 67 in the Americas: Saratoga Springs, New York, USA (SARA),  
 68 located at 43°N, and Manaus, Amazonas, Brazil (MANA),  
 69 located near the equator at 3°S. Saratoga Springs and Manaus  
 70 differ considerably in climate, such as mean annual tempera-  
 71 ture (Figure 1A), and mice from these environments show  
 72 several phenotypic differences consistent with climatic adapta-  
 73 tion. Specifically, mice from New York are larger, retain more

heat through their fur, and have shortened extremities com-  
 74 pared to mice from Brazil (ANOVA tests,  $P < 0.05$ ) (Figure  
 75 1B; Table S1), suggesting adaptation to cold environments  
 76 (26).  
 77

We explored patterns of gene expression evolution by rear-  
 78 ing New York and Brazil mice under two temperatures (5°C  
 79 and 21°C) and sequenced brown adipose tissue (BAT) and  
 80 liver transcriptomes of 48 individuals (6 / line / sex / environ-  
 81 ment) (Figure 1C). We chose these two tissues as they play  
 82 important roles in both metabolism and adaptive thermogene-  
 83 sis (28–30). Principal component analysis (PCA) of all gene  
 84 expression data revealed tissue type as the largest source of  
 85 variance (PC1 ~97% of variance explained), followed by sex  
 86 (PC2 ~1.5%) (Figure S1). Within each tissue and sex, New  
 87 York and Brazil mice cleanly separated along PC1 (>60%  
 88 of variance explained), while PC3 largely separated warm-  
 89 and cold-reared mice (>4% of variance explained) (Figures  
 90 1D, S2). We also identified more than a third of genes to be  
 91 differentially expressed between New York and Brazil mice  
 92 (false discovery rate (FDR) < 0.05) (Figures 1E, S3-S4), with  
 93 most expression differences concordant across environments and  
 94 sexes.  
 95

This strong pattern of divergence was also apparent when  
 96 we categorized differentially expressed genes as those showing  
 97 genetic variation (G), environmental variation [i.e., plasticity  
 98

(E)], or genetic variation for plasticity (i.e., GxE) (Figures 2A, S3). Genotype had >1.5x larger effect size (calculated as the mean absolute value of the log<sub>2</sub> fold change) on gene expression than environment across both tissues (Figures 2A, S3). Similar effects were identified when we attributed expression differences to genotype and sex, though these patterns were largely tissue-dependent (Figure S4). Overall, these results demonstrate that within sexes and tissues, genotype plays a larger role than either environment or GxE interactions in shaping expression differences between temperate and tropical house mice.

**Reduced gene expression plasticity in cold-adapted mice.** Given that New York and Brazil mice have evolved under different thermal environments, we reasoned that gene expression responses to temperature would differ between these lines. Roughly ~5% and ~10% of all expressed genes showed significant GxE in liver and BAT, respectively (FDR < 0.05) (Figures 2B, S3). Notably, we found fewer differentially expressed genes in New York mice (~5% BAT; ~1% liver) than Brazil mice (~10% BAT; ~5% liver) (Chi-square tests, liver and BAT:  $P < 0.05$ ), suggesting that New York mice may be more buffered against cold stress.

Next, we explored the relationship between plastic gene expression changes and evolved gene expression differences. Adaptive plasticity may facilitate the colonization of new environments by moving a population closer to the phenotypic optimum, while non-adaptive plasticity may do the opposite (31, 32). To determine if the pronounced temperature response of Brazil mice is adaptive or non-adaptive, we asked whether the direction of expression plasticity of Brazil mice correlates with expression divergence between New York and Brazil mice (see Methods). We found that expression plasticity generally goes in the same direction as evolved divergence for both tissues (positive Spearman's correlations,  $P < 0.05$ ) (Figures 2C, S3), consistent with patterns of adaptive plasticity (25, 33, 34). These results suggest that plasticity may have facilitated the rapid expansion of house mice into new environments.

**Expression divergence is predominantly due to cis-regulatory changes, and most cis-changes are robust to environmental temperature.** To investigate the gene regulatory mechanisms underlying expression differences between New York and Brazil mice, we generated BAT and liver RNA-seq from NY x BZ F1 hybrids reared in both warm and cold environments (Figures 1C, S5). Measuring gene expression in F1 hybrids allowed us to discern if parental gene expression differences are due to *cis*- and/or *trans*-acting changes by assessing patterns of allele-specific expression (ASE) (Figure 3A). Specifically, as F1 hybrids inherit both a Brazil allele and New York allele within in the same *trans*-acting environment, differences in expression between alleles are indicative of one or more *cis*-acting elements (35–37). In contrast, if no ASE is detected in hybrids but differences are observed between parental lines, we can infer divergence is likely due to *trans*-acting factors (35–37).

We tested 5,898 genes for ASE based on the presence of fixed differences between parental Brazil and New York lines (see Methods). While most genes showed conserved gene regulation between New York and Brazil mice (~75%), genes with evidence for expression divergence tended to involve changes in *cis* (Figure 3B). Specifically, 7-8% of genes showed

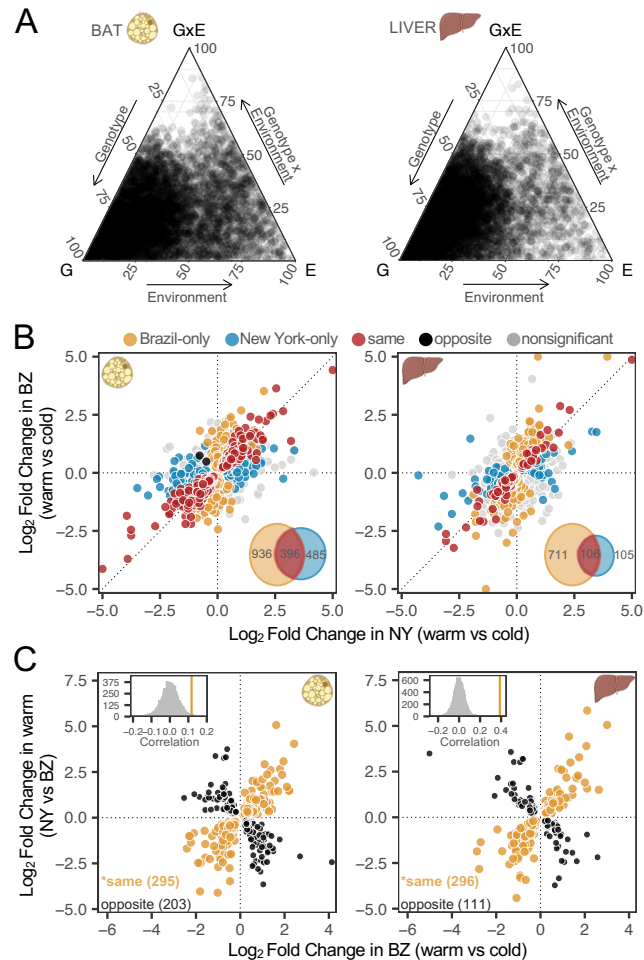

**Fig. 2. Patterns of genotype-by-environment interactions (GxE).** (A) Ternary plots depicting the proportion of each gene's expression variance explained by genotype (G), environment (E), and GxE. The relative proportion of each factor is shown for all differentially expressed male genes in BAT and liver. Total variance is the sum of all three components. (B) Comparison of gene expression differences between temperature regimes in NY and BZ males in both BAT and liver. Log<sub>2</sub> fold changes between temperatures were calculated for all genes independently. In each panel, points (representing individual genes) are colored depending on their direction and significance of the log<sub>2</sub> fold change. GxE categories include line-specific responses or opposite responses between lines. Insets depict the total number of differentially expressed genes for each comparison (FDR < 0.05). (C) The relationship between gene expression plasticity and evolved divergence in BAT and liver. Points represent expression differences with statistically significant plasticity in BZ (cold vs warm; FDR < 0.05) as well as significant expression divergence between NY and BZ at warm temperature (FDR < 0.05). Points colored in orange represent genes with a positive correlation between plasticity and evolved divergence and represent adaptive plasticity. Points in black represent genes with a negative association and represent non-adaptive plasticity. Insets depict the observed correlation coefficient (orange solid lines) is more positive than a randomized distribution of correlation coefficients for each tissue (see Methods for details). Asterisks denote significance of adaptive plasticity for each tissue (binomial exact tests,  $P < 0.05$ ). Females show similar patterns and are depicted in Figures S2-S3.

expression divergence due to *cis* alone and 5-6% genes showed evidence of divergence due to *cis* and *trans* (Figure 3B). Only ~5% of genes involved regulatory changes solely in *trans* (Figure 3B). Moreover, the magnitude of *cis*-effects were greater than *trans*-effects per gene (Wilcoxon signed-rank test,  $P < 2.2 \times 10^{-16}$ ). The predominance of *cis*-regulatory changes relative to *trans*-changes is consistent with previous studies in house mice (38–40).

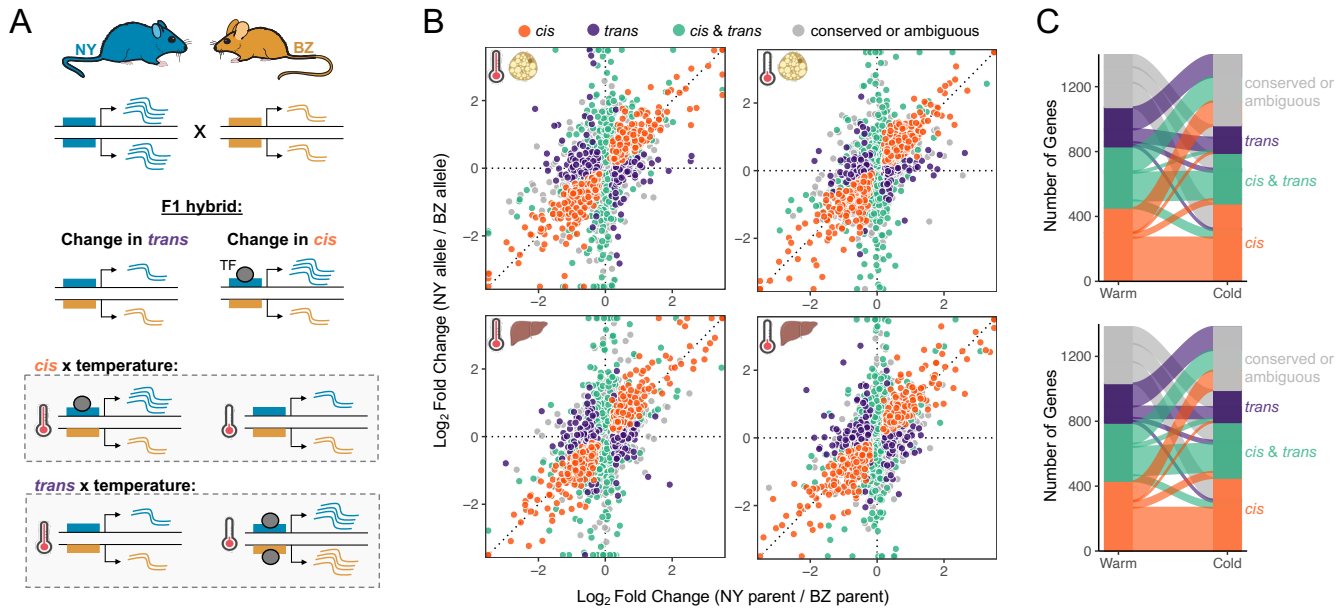

**Fig. 3. The relative distribution of regulatory changes between New York and Brazil house mice across environments and tissues. (A)** Schematic depicting how *cis*- and *trans*-changes can be inferred with F1 hybrids, and how environmental differences may result in *cis* x temperature and *trans* x temperature effects. Blue and gold boxes represent *cis*-regulatory regions for NY and BZ, respectively. Wavy lines depict transcript levels of an allele. TF = transcription factor. **(B)** Points (individual genes) represent log<sub>2</sub> fold changes between reads mapping to each allele in the hybrid (BZ allele / NY allele; y-axis) and the reads mapping to each parental line (BZ parent / NY parent; x-axis). Genes are colored based on their inferred regulatory category: orange = *cis*, purple = *trans*, green = *cis*&*trans*, gray = conserved or ambiguous. Genes categorized as conserved or ambiguous (gray points) constitute roughly 75% of all genes and are centered on the origin and mostly hidden behind other genes. **(C)** Changes in the number of genes for each inferred regulatory category between temperature regimes are illustrated in the alluvial plot. Genes that were conserved or ambiguous (gray) at both temperatures are not shown.

167 We next asked how the environment modulates gene reg-  
 168 ulatory evolution by comparing patterns of *cis*- and *trans*-  
 169 regulatory differences across environments. Similar to expres-  
 170 sion patterns observed in the parents, the majority of  
 171 genes that could be categorized across temperature treat-  
 172 ments showed the same regulatory control in both environ-  
 173 ments (~88%) (Figure 3C). For the genes that did show a  
 174 change in regulatory control, we found that *cis*-regulatory  
 175 changes were more insensitive to temperature than *trans*-  
 176 changes. Comparing the difference in magnitude of the *cis*-  
 177 and *trans*-differences between warm and cold conditions, we  
 178 found that *trans*-differences were greater between environ-  
 179 ments for both tissues (Wilcoxon signed-rank tests,  $P < 2.2 \times$   
 180  $10^{-16}$ ) (Figure S6). The cold environment also had a lower pro-  
 181 portion of genes with *trans*-divergence (Chi-square tests; BAT,  
 182  $P=0.0003$ ; liver,  $P=0.02$ ), where the proportion of genes with  
 183 only *cis*-divergence was the same across temperature condi-  
 184 tions (Chi-square tests; BAT,  $P=0.51$ ; liver,  $P=0.66$ ). These  
 185 results suggest that *trans*-effects play a larger role in gene  
 186 expression plasticity than *cis*-effects.

187 **A small number of genes show temperature-dependent**  
 188 ***cis*-regulation.** While most *cis*-effects were robust to temper-  
 189 ature, we were specifically interested in exploring whether  
 190 any genes showed temperature-dependent *cis*-effects. Such  
 191 genes are of particular interest since they correspond to *plas-*  
 192 *ticity*-eQTL (i.e., loci that harbor mutations underlying a  
 193 plastic response)(41). To identify genes for which there was  
 194 a significant effect of temperature on regulatory divergence,  
 195 we determined if either the *cis* and/or the *trans* component  
 196 showed a significant interaction with temperature (see Meth-  
 197 ods). We identified *cis* x temperature effects for 11 genes in

198 BAT (*gstm1*, *wars2*, *hsd11b1*, *itih5*, *dst*, *tmed2*, *plbd1*, *cdh13*,  
 199 *scd1*, *tmem45b*, *s100a13*) and 4 in the liver (*elovl3*, *hmgcs2*,  
 200 *wars2*, *ebpl*) (FDR < 0.1). Most of these genes showed dif-  
 201 ferences in the magnitude of ASE between temperatures, but  
 202 we also observed cases where ASE was induced by one tem-  
 203 perature treatment (i.e., *wars2*, *tmed2*, *cdh13*, *s100a13*, *ebpl*,  
 204 *hmgcs2*). Over half of the genes corresponding to *plasticity*-  
 205 eQTL showed a smaller plastic response in New York than  
 206 in Brazil, consistent with the overall reduction in expression  
 207 plasticity in cold-adapted mice. We also identified a small  
 208 number of genes with significant *trans* x temperature effects  
 209 in BAT (18 genes) and liver (1 gene) (FDR < 0.1) (Table S2).  
 210 Several of these genes with temperature-induced regulatory  
 211 differences have suggested roles in energy metabolism and  
 212 thermal tolerance (e.g., refs 42, 43–45). The identification of  
 213 temperature-dependent gene regulatory effects (especially *plas-*  
 214 *ticity*-eQTL) indicates a role for evolved changes in plasticity  
 215 between temperate and tropical mice.

216 ***Cis*-regulatory changes are largely tissue-specific and are**  
 217 **enriched for body size and metabolism.** While both liver and  
 218 BAT play essential roles in metabolism and thermogenesis,  
 219 these tissues have distinct functional properties that differen-  
 220 tiate their role in environmental adaptation. In both tissues,  
 221 genes with evidence for *cis*-divergence were enriched for GO  
 222 terms related to metabolic processes, as well as the pathway  
 223 for metabolism (Reactome R-MMU-1430728; liver, FDR=6.55  
 224  $\times 10^{-8}$ ; BAT, FDR=1.49  $\times 10^{-8}$ ). Genes with *cis*-regulatory  
 225 changes in the liver were enriched for several mutant pheno-  
 226 type annotations for homeostasis and metabolism, including  
 227 abnormal lipid homeostasis (FDR=6.248  $\times 10^{-5}$ ), abnormal  
 228 cholesterol level (FDR=0.003), abnormal energy expenditure

229 (FDR=0.001), and abnormal triglyceride level (FDR=0.008).  
230 Additionally, genes with *cis*-changes in the liver showed a  
231 greater than 2-fold enrichment of genes with mutant pheno-  
232 types for abnormal susceptibility to weight gain (FDR=0.014)  
233 and were nominally significantly enriched for several other  
234 phenotypes related to body weight, size, and composition (Figure  
235 S7). Interestingly, two genes (*bcat2*, *adam17*) exhibiting  
236 *cis*-regulatory divergence were previously implicated in body  
237 weight differences in North American populations (27), further  
238 supporting their role in adaptive divergence between house  
239 mouse populations.

240 Next, we assessed the extent to which regulatory control is  
241 tissue-biased. Comparing gene expression evolution in BAT  
242 and liver, we found regulatory divergence to be largely tissue-  
243 biased. The majority of genes (80%) for which we could  
244 assign a regulatory category in each tissue were assigned to a  
245 different regulatory category in the other tissue (2954/3672  
246 genes). In particular, we found that *trans*-divergence was more  
247 likely to be restricted to one tissue (with expression conserved  
248 between lines in the other tissue), compared to *cis*-changes  
249 which were more often shared (>2-fold more) (Chi-square  
250 test  $P < 0.0001$ ). This may reflect the general observation of  
251 increased tissue-specificity of *trans*-effects relative to *cis*-effects  
252 (46).

253 To formally identify tissue-biased ASE, we contrasted ASE  
254 measurements in BAT and liver for paired hybrid samples (see  
255 Methods). We identified 338 genes with evidence for differ-  
256 ential allele-specific expression between tissues (Figure S8).  
257 While the majority of these genes (77%) showed significant  
258 allele-specific expression in just one tissue, we also identified  
259 cases where allele-specific expression was present in both tis-  
260 sues but with differences in expression magnitude or direction  
261 (23%). Of these genes, forty-three had discordant allele-specific  
262 expression between tissues, where the opposite parental allele  
263 was up-regulated between tissues. Genes with tissue-biased  
264 ASE were enriched for metabolic phenotypes (e.g., abnor-  
265 mal lipid homeostasis, FDR=0.00027; increased food intake,  
266 FDR=0.036) and tissue specific functions and physiology (e.g.,  
267 abnormal adipose tissue physiology, FDR=0.007; abnormal  
268 liver morphology, FDR=0.00097). These results highlight the  
269 importance of tissue-specific gene regulation in population  
270 divergence.

271 **Positive selection on genes with *cis*-regulatory divergence in**  
272 **wild house mouse populations.** As *cis*-regulatory variants are  
273 often drivers of local adaptation (4, 47, 48), and because most  
274 regulatory divergence between New York and Brazil house  
275 mice is governed in *cis*, we next explored whether genes regu-  
276 lated in *cis* are under positive selection in wild mice from the  
277 Americas. To test this, we utilized previously published whole  
278 exome data from wild-caught individuals collected from New  
279 Hampshire/Vermont, USA (NH/VT) (24) and Manaus, Brazil  
280 (MAN) (Gutiérrez-Guerrero et al., *in prep*), and compared  
281 these data to previously published whole genome data from  
282 Eurasian populations of house mice (49). Genetic PCA dis-  
283 tinguished mice based on subspecies and population-of-origin  
284 (Figures 4A, S9), with mice from NH/VT clustering most  
285 closely with mice from Germany. These results are consistent  
286 with the suggestion that mice from eastern North America are  
287 most closely related to populations in northern Europe (50,  
288 51).

289 Next, to identify genetic signatures of adaptation in house

290 mice from the Americas, we performed a scan for regions  
291 of genetic differentiation consistent with selection using a  
292 normalized version of the population branch statistic (*PBSn1*).  
293 We used this test to identify highly differentiated loci in our  
294 focal populations in the Americas (MAN and NH/VT) relative  
295 to Eurasian populations (see Methods). In total, 83,538 and  
296 84,420 non-overlapping 5-SNP windows were analyzed for  
297 Manaus and NH/VT, respectively. Outlier windows in NH/VT  
298 and MAN overlapped 538 and 530 genes, respectively (File  
299 S1).

300 Finally, we asked to what extent genomic divergence among  
301 wild mice from temperate and tropical environments is asso-  
302 ciated with *cis*-regulatory changes. Specifically, if natural  
303 selection associated with climatic adaptation has acted mainly  
304 on regulatory variants, we predicted an enrichment of *PBSn1*  
305 outliers near genes displaying ASE (e.g., ref. 52). To test  
306 this prediction, we overlapped candidate regions for selection  
307 based on *PBSn1* outlier windows with genes for which we iden-  
308 tified evidence for allele-specific expression in BAT or liver.  
309 In NH/VT, we found outlier windows overlapped 71 and 62  
310 genes with evidence for *cis*-regulatory divergence under warm  
311 and cold conditions, respectively (overlap 44 genes) (Figure  
312 4B; File S1). The overlap between genes with *cis*-regulatory  
313 divergence and outlier windows in this population was greater  
314 than expected by chance (hypergeometric test,  $P=0.0016$ ) and  
315 genes with allele-specific expression were associated with higher  
316 average *PBSn1* scores than background genes ( $P=0.00026$ , see  
317 Methods). ASE outliers were enriched for mutant phenotypes  
318 related to body size, growth, and metabolism relative to other  
319 genes with *cis*-regulatory divergence (e.g., abnormal postnatal  
320 growth/weight/body size, abnormal susceptibility to weight  
321 gain, decreased susceptibility to diet-induced obesity, and in-  
322 creased energy expenditure; FDR < 0.05) (Figure 4C; File S1).  
323 This gene set also includes genes whose expression in the liver  
324 was previously associated with body mass variation in natu-  
325 ral populations of North American house mice (*bcat2*, *col6a1*,  
326 *col5a2*, *col3a1*) (24, 27). Additionally, this set included genes  
327 implicated in obesity and metabolic phenotypes in humans  
328 (e.g., *urn*, *plaat3*, *prkar2b*, *sulf2*, *smoc1*) (Figure 4D) (53) and  
329 mice (Table S3). Together, these results suggest that selection  
330 has acted on *cis*-regulatory genes related to metabolism and  
331 body weight in New York mice.

332 In contrast, we did not find significant overlap between  
333 genes with allele-specific expression and *PBSn1* outliers for  
334 Manaus ( $P=0.4$ ). Outlier windows overlapped 49 and 51 genes  
335 with evidence for *cis*-regulatory divergence under warm and  
336 cold conditions, respectively (Figure S10). Genes were not  
337 enriched for metabolic process terms or phenotypes. The  
338 significant overlap between *PBSn1* outliers and ASE in the  
339 temperate mice but not in the tropical mice suggests that  
340 adaptive gene expression differences may predominantly re-  
341 flect adaptation to cold environments (rather than to warm  
342 environments).

## 343 Discussion

344 Understanding how both genetic and non-genetic factors in-  
345 fluence gene expression is essential to understanding adaptive  
346 evolution. Here, we utilized allele-specific expression in liver  
347 and brown adipose tissue to characterize *cis* and *trans* changes  
348 underlying expression differences between temperate and tropi-  
349 cal house mice when reared under warm and cold laboratory

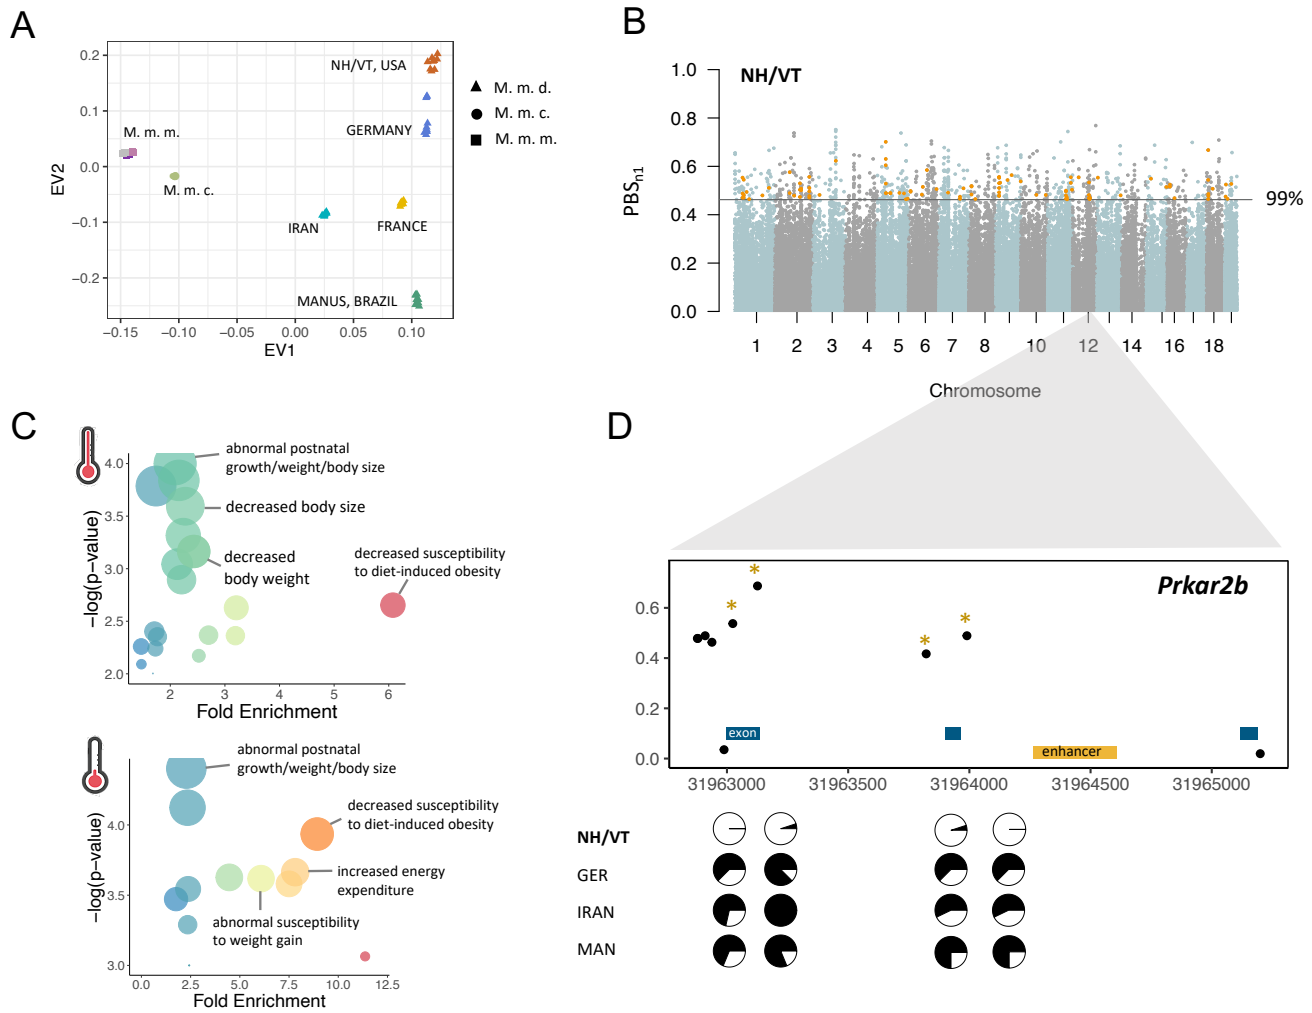

**Fig. 4. Genomic outliers are enriched in genes with evidence for *cis*-regulatory divergence.** (A) Genetic PCA of wild house mice distinguished mouse populations based on population-of-origin (*Mus musculus domesticus* (M.m.d.)) and subspecies (*Mus musculus castaneus* (M.m.c.), *Mus musculus musculus* (M.m.m.)). The x and y axes show the first and second SNP eigenvectors, respectively (EV; PC1: 29% of variance, PC2: 8% of variance). (B) Autosomal selection scan showing *PBSn1* results for the New Hampshire/Vermont (NH/VT) focal population. Orange points depict genes that exhibit *cis*-regulatory divergence and overlap with outlier regions. (C) Gene set enrichment analysis for genes with ASE that overlap genomic outliers in the NH/VT population. ASE outliers were highly enriched for mouse phenotypes related to body size differences and metabolic features, across both temperature treatments. (D) Candidate gene that exhibits *cis*-regulatory divergence and overlaps with outlier region. Allele frequencies (pie charts) of significant SNPs (gold asterisks) in the four populations.

350 environments. We found that most regulatory divergence  
351 was governed by *cis*-regulatory variation, and that these *cis*-  
352 effects were largely independent of environmental temperature.  
353 However, a subset of genes showed temperature-dependent  
354 *cis*-effects and thus represent QTL for expression plasticity.  
355 We also found that many *cis*-regulated genes were associated  
356 with metabolism and body size, but that these *cis*-effects were  
357 often tissue-biased. Finally, overlap of genes exhibiting *cis*-  
358 regulatory divergence with scans for selection identified several  
359 *cis*-regulatory genes under positive selection, consistent with  
360 a role for these loci in local adaptation. The combination  
361 of allele-specific expression with genomic scans is a fruitful  
362 approach to identify the regulatory architecture of adaptive  
363 evolution in natural populations.

364 Comparisons between New York and Brazil house mice  
365 provide insights into the evolution of gene regulation over very  
366 short evolutionary timescales. Although New York and Brazil

367 house mice colonized the Americas only within the last ~500  
368 years, we find evidence for pervasive regulatory divergence.  
369 Moreover, the regulatory control underlying this intraspecific  
370 divergence is overwhelmingly due to *cis* variants either alone or  
371 together with one or more *trans* variants. The predominance  
372 of *cis*-regulatory divergence is in agreement with previous  
373 interspecific studies in house mice (38, 40, 54), and has been  
374 observed in intraspecific comparisons of other species (55–  
375 61). Although some evidence suggests *trans*-effects play larger  
376 roles within rather than between species (62–66), it is likely  
377 that certain evolutionary contexts, timescales, and selection  
378 pressures may favor either *cis*- or *trans*-acting mechanisms (67,  
379 68). Regardless, our study indicates that strong intraspecific  
380 *cis*-regulatory divergence between populations can accrue on  
381 extremely short timescales.

382 Despite the plastic response of gene expression in both  
383 New York and Brazil house mice, *cis*-regulatory divergence

384 was relatively robust to environmental temperature. In con- 444  
385 trast, changes in the environment preferentially affected *trans*- 445  
386 regulation profiles, suggesting that *trans*-effects play a more 446  
387 pronounced role in gene expression plasticity. Greater sensitiv- 447  
388 ity of *trans*-effects to the environment is in strong agreement 448  
389 with previous studies (11, 12, 41, 57, 69–71) and may be due 449  
390 to the role *trans*-acting factors play in signaling pathways that 450  
391 become activated in response to environmental change (72). 451  
392 Indeed, we found that the effect sizes of *trans* were greater 452  
393 than those of *cis* across environments, indicating that much 453  
394 of expression plasticity we observed is governed by changes 454  
395 in *trans*. Moreover, the pronounced expression plasticity we 455  
396 observe in Brazil house mice largely goes in the same direction 456  
397 as evolved divergence (i.e., adaptive plasticity)(33, 34). Previ- 457  
398 ous studies in house mice have implicated the role of adaptive 458  
399 gene expression plasticity in local adaptation (25), suggesting 459  
400 that plasticity in general may have aided in the colonization 460  
401 of new environments. 461

402 Although ASE was generally observed at both tempera- 462  
403 tures for a given gene, a subset of genes showed temperature- 463  
404 dependent *cis*-effects. These loci are of particular interest since 464  
405 these constitute *plasticity*-eQTL and harbor mutations that di- 465  
406 rectly affect plasticity of gene expression. Genetic assimilation 466  
407 refers to the conversion of a plastic response to a fixed response 467  
408 (73–76). If the ancestral allele at a *plasticity*-eQTL encodes a 468  
409 plastic response and the derived allele encodes a fixed response, 469  
410 then the *plasticity*-eQTL represents a case of genetic assimila- 470  
411 tion. For example, selection in a cold, temperate environment 471  
412 may have led to the reduced plasticity exhibited in New York 472  
413 mice. A similar mechanism was recently proposed to underlie 473  
414 rapid divergence in threespine stickleback (57). *Cis*-regulatory 474  
415 variants could rapidly canalize expression through the loss 475  
416 or gain of specific binding sites for conditionally expressed 476  
417 transcription factors, thereby decoupling a gene's expression 477  
418 from the environment (72). Many of the *cis* x environment 478  
419 candidates illustrate potential regulatory mechanisms under- 479  
420 lying genetic assimilation as many of them exhibit reduced 480  
421 plasticity in New York mice (Figure S11). For example, *scd1* 481  
422 plays an important role in basal and cold-induced thermogen- 482  
423 esis (77, 78) and New York mice show higher and constitutive 483  
424 average expression of *scd1* in BAT compared to Brazil mice 484  
425 (Figure S11). Further study of these genes may help us under- 485  
426 stand the relationship between adaptive plasticity and genetic 486  
427 adaptation to novel environments. 487

428 Finally, we discovered significant overlap between genes 488  
429 exhibiting *cis*-regulatory divergence and genomic SNPs that 489  
430 show evidence for positive selection in wild mice, suggest- 490  
431 ing that selection has acted mainly on regulatory variants 491  
432 associated with local adaptation. This overlapping gene set 492  
433 is enriched for mutant phenotypes related to body size and 493  
434 metabolism in New York mice and are consistent with previous 494  
435 studies showing selection on genes with *cis*-eQTLs related to 495  
436 body size in North American mice (27). Together, our results 496  
437 highlight how natural selection on *cis*-regulatory divergence 497  
438 is a likely contributor to rapid climatic adaptation in house 498  
439 mice. 499

## 440 Materials and Methods

441 **Animals and Evolved Phenotypic Differences.** To character- 500  
442 ize evolved phenotypic differences between New York and Brazil 501  
443 house mice, we used two wild-derived inbred lines of house 502  
503

444 mice: SARA (New York) and MANA (Brazil). The estab- 445  
446 lishment of these lines has been described previously (26). 447  
448 Mice from each line were housed in a standard laboratory 449  
449 environment at 21°C with a 12L:12D cycle. Roughly equal 450  
450 numbers of males and females were produced for each within- 451  
451 line comparison ( $n = 32$  per line; File S1). We took standard 452  
452 museum measurements on all mice and removed and prepared 453  
453 dried skins. Thermal conductance of pelage (referred to as 454  
454 pelage conductance ( $W^{-1}m^{-2}C^{-1}$ )) was measured on dry skins 455  
455 following the protocol of Riddell et al. 2021 (see SI Methods) 456  
456 (79). Tail length and ear length were corrected for body mass 457  
457 for each individual. Effects of line and sex for each pheno- 458  
458 type were modeled using ANOVA. All statistical analyses were 459  
459 performed using packages available in R (v.4.1.1). 460

461 **Experimental Design and Tissue Collection.** To investigate the gene 462  
462 regulatory mechanisms underlying local adaptation in house 463  
463 mice, we generated F1 hybrids by crossing a SARA female 464  
464 with a MANA male. All experimental animals were born at 465  
465 room temperature (21°C) and were provided water and com- 466  
466 mercial rodent chow *ad libitum*. We weaned and singly housed 467  
467 SARA, MANA, and F1 hybrids at ~3 weeks of age. We split 468  
468 3.5-week-old full-sibs and F1 hybrids into size-matched experi- 469  
469 mental groups across cold (5°C) and warm (21°C) treatments. 470  
470 Mice were kept in their respective experimental environment 471  
471 until ~12 weeks of age, at which point individuals were euth- 472  
472 anized via cervical dislocation. We took standard museum 473  
473 measurements and then rapidly dissected and preserved liver 474  
474 and brown adipose tissue in RNAlater at 4°C overnight and 475  
475 moved to -80°C until RNA extraction. We prepared standard 476  
476 museum skeletons and accessioned them in UC Berkeley's Mu- 477  
477 seum of Vertebrate Zoology (catalog numbers are given in File 478  
478 S1). All experimental procedures were in accordance with the 479  
479 UC Berkeley Institutional Animal Care and Use Committee 480  
480 (AUP-2017-08-10248). 481

482 **RNA Extraction, Library Preparation, and Sequencing.** We extracted 483  
483 total RNA from liver and BAT from each sample ( $n = \sim 6$  per 484  
484 genotype/sex/treatment/tissue) using the RNeasy PowerLyzer 485  
485 Kit (QIAGEN). We generated Illumina cDNA libraries from 486  
486 1  $\mu g$  of purified RNA using KAPA Stranded mRNA-Seq Kit 487  
487 (Illumina), and uniquely indexed libraries using unique dual 488  
488 indexes (Illumina). Libraries were pooled in equal molar 489  
489 concentration and sequenced on one lane each of 150 bp paired- 490  
490 end NovaSeq S1 and NovaSeq S4 at the Vincent J. Coates 491  
491 Genomics Sequencing Center at UC Berkeley. We filtered raw 492  
492 reads below a Phred quality score of 15 and trimmed adapter 493  
493 sequences using fastp (80). 494

495 **Parental Gene Expression Analyses.** After cleaning and trimming 496  
496 parental sequences of MANA and SARA, we mapped reads 497  
497 to the *Mus musculus* reference genome (GRCm38/mm10) us- 498  
498 ing STAR (81). We counted reads overlapping exons using 499  
499 HTSeq (82) based on the Ensembl GRCm38.98 annotation. 500  
500 We imported raw count data into R (v.4.1.1) and transformed 501  
501 expression values using variance stabilizing transformation 502  
502 (83) to assess transcriptome-wide expression patterns via PCA. 503  
503 Next, we removed genes with fewer than an average of 10 504  
504 reads per individual within each tissue, retaining ~14K ex- 505  
505 pressed genes per tissue for downstream analyses. We then 506  
506 used DESeq2 (83) on raw, filtered reads to quantify expres- 507  
507 sion patterns by fitting a generalized linear model following 508  
508 a negative binomial distribution. We computed differential 509  
509

504 expression between lines with the model population + envi-  
505 ronment + population\*environment to determine the effects  
506 of genotype, environment, and genotype-by-environment on  
507 expression patterns for each tissue and sex, separately. We  
508 also identified genotype-by-sex interactions using a similar  
509 model in DESeq2 (see SI Methods and Results).

510 To determine if gene expression plasticity is correlated with  
511 gene expression divergence, we compared genes with signifi-  
512 cant plasticity to genes with significant expression divergence  
513 within each tissue and sex, separately. We used Spearman's  
514 rank correlation coefficients to assess overall directionality and  
515 significance of gene expression. To account for potential sta-  
516 tistical artifacts (84), we compared the observed correlations  
517 to a permuted distribution (10,000 permutations). Lastly, we  
518 used a Benjamini-Hochberg multiple test correction (85) on  
519 all resulting *P*-values and considered genes with FDR < 0.05  
520 to be significantly differentially expressed.

521 **Identifying Variants between Parental Lines.** To identify differences  
522 between lines for allele-specific read assignment, we performed  
523 SNP calling on whole genome sequence data from one female  
524 each of MANA and SARA. We mapped genomic reads with  
525 Bowtie2 (86) to the mm10 reference genome (setting: -very-  
526 sensitive) obtained from Ensembl. We marked duplicates  
527 with the Picard tool MarkDuplicates and then we used the  
528 GATK tools HaplotypeCaller and GenotypeGVCFs for joint  
529 genotyping across genomic samples. We filtered for low quality  
530 SNP calls with VariantFiltration (QD < 2.0; QUAL < 30.0;  
531 FS > 200; ReadPosRankSum < -20.0). To reduce the influence  
532 of genotyping error on allele-specific expression, we mapped  
533 RNA-seq reads from all individuals and then counted allele-  
534 specific reads aligned to each site we genotyped with the GATK  
535 tool ASEReadCounter. We excluded sites for which we did not  
536 have coverage of at least 5 reads from each population-specific  
537 allele. These SNPs were then used for identifying allele-specific  
538 reads.

539 **Mapping Allele-Specific Reads.** For allele-specific expression anal-  
540 yses, we mapped reads from hybrid individuals to the mouse  
541 reference genome (GRCm38/mm10) using STAR. We used  
542 WASP (87) to reduce the potential for reference mapping bias.  
543 We retained reads that overlapped a population-specific variant  
544 and that passed WASP filtering for our allele-specific expres-  
545 sion analysis. We separated reads overlapping informative  
546 variants into allele-specific pools (NY, BZ) based on genotype  
547 for quantification. We used HTSeq to count the number of  
548 reads associated with each gene per population based on the  
549 overlap of reads and annotated exonic regions based on the  
550 Ensembl GRCm38.98 annotation. We examined per site allelic  
551 reads with ASEReadCounter to quantify allele-specific map-  
552 ping over individual sites. Proportions of reads overlapping  
553 the references vs. alternative allele (REF allele / (ALT allele  
554 + REF allele)) showed a median 0.5 across samples (Figure  
555 S12), indicating no evidence for reference mapping bias.

556 **Identifying Cis- and Trans-Regulatory Divergence.** Parental (F0)  
557 and F1 expression data was used to characterize *cis* and *trans*  
558 effects. To categorize regulatory divergence at each gene, we  
559 inferred differential expression by analyzing raw counts using  
560 DESeq2. To identify genes with evidence of allele-specific  
561 expression in hybrid individuals, we took reads that mapped  
562 preferentially to either New York or Brazil alleles and fit  
563 these to a model with allele (NY vs. BZ), sample (individual),

and tissue (BAT, liver) for hybrid male samples in DESeq2  
(Wald-test). As read counts come from the same sequencing  
library, library size factor normalization was disabled in DE-  
Seq2 by setting SizeFactors = 1 for measures of allele-specific  
expression. We used males to assign regulatory categories to  
maximize power due to a larger number of hybrid samples  
sequenced (6 replicates of males vs. 4 replicates of females).  
Differential expression between alleles in the F1 is evidence  
for *cis*-regulatory divergence, where differential expression in  
the F0 generation is not recapitulated between alleles in the  
F1 is evidence for *trans* divergence. The *trans* component (T)  
was assessed through a Fisher's Exact Test on reads mapping  
to each parental allele in the hybrid vs. parental read counts,  
summed over all replicates (37, 62). Reads were randomly  
down-sampled to account for library size differences between  
parental and F1 replicates (88, 89). *P*-values for each test  
were corrected for FDR with the Benjamini-Hochberg method.  
Genes were sorted into categories based on hard FDR thresh-  
olds (FDR < 0.05) (37, 62), as described below. We analyzed  
temperature treatments (warm and cold) separately for regu-  
latory assignment and then compared as described below:

*Conserved*: no significant difference between lines (F0), no  
significant difference between alleles (F1), no significant *T*.

*Cis* only: significant difference between lines (F0), signifi-  
cant difference between alleles (F1), no significant *T*.

*Trans* only: significant difference between lines (F0), no  
significant difference between alleles (F1), significant *T*.

*Cis & Trans* designations: significant differences between  
alleles (F1) and significant *T*. This category was further sub-  
divided into *cis* + *trans* (reinforcing), *cis* + *trans* (opposing),  
*compensatory*, and *cis* x *trans*, as previously described (38,  
40).

*Ambiguous*: all other patterns.

We identified *cis* x temperature interactions using DESeq2  
under a model specifying temperature (cold vs. warm) and  
allele (BZ vs. NY). To identify *trans* x temperature interactions,  
we fit a model that included parental and hybrid read counts  
for temperature (cold vs. warm), allele/genotype (BZ vs. NY),  
and generation (F1 vs. F0) and interactions. Similar models  
were also used to identify sex-specific regulatory patterns in  
DESeq2 (see SI Methods and Results).

**Genetic PCA of *M. m. domesticus* populations.** We used SNPRelate  
(90) to perform PCA and IBS hierarchical clustering of popula-  
tion genetic data. Genomic data from 3 Eurasian populations  
of *M. m. domesticus* (Germany [Cologne-Bonn], France, and  
Iran) and *M. m. musculus* and *M. m. castaneus* subspecies  
were downloaded from <http://wwwuser.gwdg.de/~evolbio/evolgen/wildmouse/> (49). For PCA, biallelic variants genotyped across  
all these individuals were extracted and pruned for linkage dis-  
equilibrium in SNPRelate (thresholds=0.2) resulting in 22,126  
variant sites for PCA and IBS clustering for *M. m. domesticus*  
comparisons and 25,467 variants for global *Mus* comparisons  
(Figures 4A, S9). Altering the pruning threshold to 0.5 did  
not result in any change in population clustering.

**Autosomal Scans for Selection.** To identify regions with evidence  
for selection in the Americas, we scanned the exomes of our  
North and South American focal populations for selection by  
using a modification of the population branch statistic (PBS)  
which summarizes a three-way comparison of allele frequencies  
between a focal group, a closely related population, and an



624 outgroup comparison ( $PBSn1$ ) (91, 92):

$$625 \quad PBSn1 = \frac{PBS_1}{1 + PBS_1 + PBS_2 + PBS_3}$$

626 Here,  $PBS1$  indicates PBS calculated as either Manaus or  
627 NH/VT as the focal population, and  $PBS2$  and  $PBS3$  indi-  
628 cate PBS calculated for Eurasians populations as the focal  
629 populations (France or Germany and Iran, respectively). To  
630 maximize the number of sites that could be compared, Ameri-  
631 can populations are not directly compared in the branch test  
632 due to the reduced representation of exome data and high per  
633 site  $F_{st}$  values between the two populations (Figure S13). In-  
634 stead, NH/VT and MAN were each compared to two Eurasian  
635 populations [(MAN), France) Iran and ((NH/VT) Germany)  
636 Iran)], selected based on population clustering (Figure S9).  
637 We restricted our SNP set to biallelic variants across the 3  
638 populations being compared and required that at least six  
639 individuals in the focal branch be genotyped. We note that  
640 the NH/VT sample used in the PBS test is geographically  
641 close to the origin of the SARA line.

642 We used VCFtools (93) to calculate Weir and Cockerham  
643  $F_{st}$  at each variant position. These values were used to calcu-  
644 late  $PBSn1$  for non-overlapping blocks of 5 SNPs. We consider  
645 blocks in the top 1% of  $PBSn1$  scores outliers and do not at-  
646 tempt to assign  $P$ -values to each SNP-block (94). Outliers  
647 were  $>3$  standard deviations above the mean windowed value  
648 of SNP-blocks in each comparison (MAN focal, median=0.045;  
649 NH/VT focal median = 0.064). We identified windows overlap-  
650 ping genes based on Ensembl gene coordinates (mm10) and the  
651 BEDTools “intersect” tool (95). As allele-specific expression  
652 in F1s is consistent with local independent genetic changes  
653 influencing gene expression, we focused on genes with evidence  
654 for *cis*-regulatory divergence (i.e., differences in expression  
655 between parental alleles in the F1) for overlap with outlier loci.  
656 To ask whether allele-specific expression was associated with  
657 elevated  $PBSn1$  scores, we used a generalized linear model in-  
658 corporating gene category (ASE or no ASE) and SNP density  
659 per kb as factors to  $PBSn1$  scores. SNP density was calculated  
660 by dividing the number of informative sites between NY and  
661 BZ for allele-specific expression per gene by transcript length.

662 **Enrichment Analyses.** We performed all GO and pathway enrich-  
663 ment analyses with PANTHER (96, 97). Phenotype enrich-  
664 ment analyses were performed with ModPhea (98). We anno-  
665 tated genes to specific phenotypes based on Mouse Genome  
666 Informatics phenotype annotations (<http://www.informatics.jax.org/>).  
667

668 **Data Availability.** Scripts are available on GitHub([https://github.com/malballinger/BallingerMack\\_NYBZase\\_2022](https://github.com/malballinger/BallingerMack_NYBZase_2022)). All sequence  
669 data generated in this study have been deposited to the Na-  
670 tional Center for Biotechnology Information Sequence Read  
671 Archive under accession BioProject ID PRJNAXXX. All other  
672 data are included in the article and/or SI Appendix.  
673

674 **ACKNOWLEDGMENTS.** We thank Beth Dumont for providing  
675 whole genome sequences of MANA and SARA. We thank Yocelyn  
676 Gutiérrez-Guerrero for providing exome sequences from a popula-  
677 tion from Manaus, Brazil. Funding and support for this work was  
678 provided by the National Institutes of Health (NIH; R01 GM074245  
679 and R01 GM127468 to M.W.N.). This work used the Extreme  
680 Science and Engineering Discovery Environment (XSEDE), which  
681 is supported by National Science Foundation grant number ACI-  
682 1548562. M.A.B. was supported by a National Science Foundation

Graduate Research Fellowship (DGE-1106400), a Junea W. Kelly  
683 Museum of Vertebrate Zoology Graduate Fellowship, and a Uni-  
684 versity of California Berkeley Philomathia Graduate Fellowship.  
685 K.L.M. was supported by a Ruth Kirschstein National Research  
686 Service Award from NIH and a Stanford Center for Computational,  
687 Evolutionary and Human Genomics postdoctoral fellowship.  
688

## 689 References

- 690 1. King MC, Wilson AC (1975) Evolution at two levels in  
691 humans and chimpanzees. *Science* 188(4184):107–116.
- 692 2. Wray GA, et al. (2003) The evolution of transcriptional  
693 regulation in eukaryotes. *Mol Biol Evol* 20(9):1377–1419.
- 694 3. Jones FC, et al. (2012) The genomic basis of adaptive  
695 evolution in threespine sticklebacks. *Nature* 484(7392):55–  
696 61.
- 697 4. Fraser HB (2013) Gene expression drives local adaptation  
698 in humans. *Genome Res* 23(7):1089–1096.
- 699 5. Wray GA (2007) The evolutionary significance of *cis*-  
700 regulatory mutations. *Nat Rev Genet* 8(3):206–216.
- 701 6. Wittkopp PJ, Kalay G (2011) *Cis*-regulatory elements:  
702 Molecular mechanisms and evolutionary processes underly-  
703 ing divergence. *Nat Rev Genet* 13(1):59–69.
- 704 7. Carroll SB (2008) Evo-devo and an expanding evolutionary  
705 synthesis: A genetic theory of morphological evolution. *Cell*  
706 134(1):25–36.
- 707 8. Stern DL, Orgogozo V (2008) The loci of evolution: How  
708 predictable is genetic evolution? *Evolution* 62(9):2155–2177.
- 709 9. Cooper TF, Rozen DE, Lenski RE (2003) Parallel changes  
710 in gene expression after 20,000 generations of evolution in  
711 *escherichia coli*. *Proc Natl Acad Sci* 100(3):1072–1077.
- 712 10. Stern DL, Orgogozo V (2009) Is genetic evolution pre-  
713 dictable? *Science* 323(5915):746–751.
- 714 11. Smith EN, Kruglyak L (2008) Gene-environment interaction  
715 in yeast gene expression. *PLoS Biol* 6(4):e83.
- 716 12. Tirosh I, Reikhav S, Levy AA, Barkai N (2009) A yeast  
717 hybrid provides insight into the evolution of gene expression  
718 regulation. *Science* 324(5927):659–662.
- 719 13. Promislow D (2005) A regulatory network analysis of phe-  
720 notypic plasticity in yeast. *Am Nat* 165(5):515–523.
- 721 14. West-Eberhard MJ (2003) *Developmental plasticity and*  
722 *evolution* (Oxford University Press).
- 723 15. West-Eberhard MJ (2005) Developmental plasticity and the  
724 origin of species differences. *Proc Natl Acad Sci* 102 Suppl  
725 1:6543–6549.
- 726 16. St Pierre CL, et al. (2022) Genetic, epigenetic, and envi-  
727 ronmental mechanisms govern allele-specific gene expression.  
728 *Genome Res* 32(6):1042–1057.
- 729 17. Lopes-Ramos CM, et al. (2020) Sex differences in gene  
730 expression and regulatory networks across 29 human tissues.  
731 *Cell Rep* 31(12):107795.
- 732 18. He F, et al. (2021) *Cis*-regulatory evolution spotlights  
733 species differences in the adaptive potential of gene expres-  
734 sion plasticity. *Nat Commun* 12(1):3376.
- 735 19. Hadadi N, et al. (2022) Comparative multi-tissue profiling  
736 reveals extensive tissue-specificity in transcriptome repro-  
737 gramming during thermal adaptation. *eLife* 11.
- 738 20. Tung J, Zhou X, Alberts SC, Stephens M, Gilad Y (2015)  
739 The genetic architecture of gene expression levels in wild  
740 baboons. *eLife* 4:e04729.
- 741 21. Naranjo S, et al. (2015) Dissecting the genetic basis  
742 of a complex *cis*-regulatory adaptation. *PLoS Genet*  
743 11(12):e1005751.
- 744 22. Lynch CB (1992) Clinal variation in cold adaptation in  
745 *mus domesticus*: Verification of predictions from laboratory  
746 populations. *Am Nat* 139(6):1219–1236.

- 734 23. Ferris KG, et al. (2021) The genomics of rapid climatic adaptation and parallel evolution in North American house mice. *PLoS Genet* 17(4):e1009495. 778
- 735 24. Phifer-Rixey M, et al. (2018) The genomic basis of environmental adaptation in house mice. *PLoS Genet* 14(9):e1007672. 779
- 736 25. Bittner NKJ, Mack KL, Nachman MW (2021) Gene expression plasticity and desert adaptation in house mice. *Evolution* 75(6):1477–1491. 780
- 737 26. Ballinger MA, Nachman MW (2022) The contribution of genetic and environmental effects to Bergmann’s rule and Allen’s rule in house mice. *Am Nat* 199(5):691–704. 781
- 738 27. Mack KL, Ballinger MA, Phifer-Rixey M, Nachman MW (2018) Gene regulation underlies environmental adaptation in house mice. *Genome Res* 28(11):1636–1645. 782
- 739 28. Abumrad NA (2017) The liver as a hub in thermogenesis. *Cell Metab* 26(3):454–455. 783
- 740 29. Simcox J, et al. (2017) Global analysis of plasma lipids identifies liver-derived acylcarnitines as a fuel source for brown fat thermogenesis. *Cell Metab* 26(3):509–522.e6. 784
- 741 30. Cannon B, Nedergaard J (2004) Brown adipose tissue: Function and physiological significance. *Physiol Rev* 84(1):277–359. 785
- 742 31. Price TD, Qvarnström A, Irwin DE (2003) The role of phenotypic plasticity in driving genetic evolution. *Proc Biol Sci* 270(1523):1433–1440. 786
- 743 32. Ghalambor CK, McKAY JK, Carroll SP, Reznick DN (2007) Adaptive versus non-adaptive phenotypic plasticity and the potential for contemporary adaptation in new environments. *Funct Ecol* 21(3):394–407. 787
- 744 33. Fischer EK, Ghalambor CK, Hoke KL (2016) Can a network approach resolve how adaptive vs nonadaptive plasticity impacts evolutionary trajectories? *Integr Comp Biol* 56(5):877–888. 788
- 745 34. Ghalambor CK, et al. (2015) Non-adaptive plasticity potentiates rapid adaptive evolution of gene expression in nature. *Nature* 525(7569):372–375. 789
- 746 35. Cowles CR, Hirschhorn JN, Altshuler D, Lander ES (2002) Detection of regulatory variation in mouse genes. *Nat Genet* 32(3):432–437. 790
- 747 36. Wittkopp PJ, Haerum BK, Clark AG (2004) Evolutionary changes in *cis* and *trans* gene regulation. *Nature* 430(6995):85–88. 791
- 748 37. McManus CJ, et al. (2010) Regulatory divergence in drosophila revealed by mRNA-seq. *Genome Res* 20(6):816–825. 792
- 749 38. Goncalves A, et al. (2012) Extensive compensatory cis-trans regulation in the evolution of mouse gene expression. *Genome Res* 22(12):2376–2384. 793
- 750 39. Shen SQ, Turro E, Corbo JC (2014) Hybrid mice reveal parent-of-origin and *cis*- and *trans*-regulatory effects in the retina. *PLoS One* 9(10):e109382. 794
- 751 40. Mack KL, Campbell P, Nachman MW (2016) Gene regulation and speciation in house mice. *Genome Res* 26(4):451–461. 795
- 752 41. Li Y, et al. (2006) Mapping determinants of gene expression plasticity by genetical genomics in *C. elegans*. *PLoS Genet* 2(12):e222. 796
- 753 42. Fumagalli M, et al. (2015) Greenlandic Inuit show genetic signatures of diet and climate adaptation. *Science* 349(6254):1343–1347. 797
- 754 43. Hallmark B, et al. (2019) Genomic evidence of local adaptation to climate and diet in indigenous Siberians. *Mol Biol Evol* 36(2):315–327. 798
- 755 44. Shore AM, et al. (2013) Cold-induced changes in gene expression in brown adipose tissue, white adipose tissue and liver. *PLoS One* 8(7):e68933. 799
45. Westerberg R, et al. (2006) ELOVL3 is an important component for early onset of lipid recruitment in brown adipose tissue\*. *J Biol Chem* 281(8):4958–4968. 800
46. GTEx Consortium, et al. (2017) Genetic effects on gene expression across human tissues. *Nature* 550(7675):204–213. 801
47. Fraser HB, Moses AM, Schadt EE (2010) Evidence for widespread adaptive evolution of gene expression in budding yeast. *Proc Natl Acad Sci U S A* 107(7):2977–2982. 802
48. Fraser HB, et al. (2011) Systematic detection of polygenic cis-regulatory evolution. *PLoS Genet* 7(3):e1002023. 803
49. Harr B, et al. (2016) Genomic resources for wild populations of the house mouse, *Mus musculus* and its close relative *Mus spretus*. *Sci Data* 3(1):1–14. 804
50. Tichy H, Zaleska-Rutczynska Z, O’Huigin C, Figueroa F, Klein J (1994) Origin of the north American house mouse. *Folia Biol* 40(6):483–496. 805
51. Morgan AP, et al. (2022) Population structure and inbreeding in wild house mice (*Mus musculus*) at different geographic scales. *Hereditas* 129(3):183–194. 806
52. York RA, et al. (2018) Behavior-dependent *cis* regulation reveals genes and pathways associated with bower building in cichlid fishes. *Proc Natl Acad Sci* 115(47):E11081–E11090. 807
53. Bérubé J, Garand C, Lettre G, Lebel M (2013) The non-synonymous polymorphism at position 114 of the WRN protein affects cholesterol efflux in vitro and correlates with cholesterol levels in vivo. *Exp Gerontol* 48(6):533–538. 808
54. Crowley JJ, et al. (2015) Analyses of allele-specific gene expression in highly divergent mouse crosses identifies pervasive allelic imbalance. *Nat Genet* 47(4):353–360. 809
55. Lemmon ZH, Bukowski R, Sun Q, Doebley JF (2014) The role of cis regulatory evolution in maize domestication. *PLoS Genet* 10(11):e1004745. 810
56. Genissel A, McIntyre LM, Wayne ML, Nuzhdin SV (2008) Cis and trans regulatory effects contribute to natural variation in transcriptome of *Drosophila melanogaster*. *Mol Biol Evol* 25(1):101–110. 811
57. Verta J-P, Jones FC (2019) Predominance of *cis*-regulatory changes in parallel expression divergence of sticklebacks. *eLife* 8:e43785. 812
58. Osada N, Miyagi R, Takahashi A (2017) Cis- and trans-regulatory effects on gene expression in a natural population of *Drosophila melanogaster*. *Genetics* 206(4):2139–2148. 813
59. Lovell JT, et al. (2016) Drought responsive gene expression regulatory divergence between upland and lowland ecotypes of a perennial C4 grass. *Genome Res* 26(4):510–518. 814
60. Gould BA, Chen Y, Lowry DB (2018) Gene regulatory divergence between locally adapted ecotypes in their native habitats. *Mol Ecol* 27(21):4174–4188. 815
61. Fear JM, et al. (2016) Buffering of genetic regulatory networks in *Drosophila melanogaster*. *Genetics* 203(3):1177–1190. 816
62. Coolon JD, McManus CJ, Stevenson KR, Graveley BR, Wittkopp PJ (2014) Tempo and mode of regulatory evolution in *Drosophila*. *24(5):797–808*. 817
63. Hart JC, Ellis NA, Eisen MB, Miller CT (2018) Convergent evolution of gene expression in two high-toothed stickleback populations. *PLoS Genet* 14(6):e1007443. 818
64. Jacobs A, et al. (2022) Temperature-dependent gene regulatory divergence underlies local adaptation with gene flow in the Atlantic silverside. *bioRxiv:2022.04.27.489786*. 819
65. Lemos B, Araripe LO, Fontanillas P, Hartl DL (2008) Dominance and the evolutionary accumulation of *cis*- and *trans*-effects on gene expression. *Proc Natl Acad Sci U S A* 105(38):14471–14476. 820
66. Emerson JJ, et al. (2010) Natural selection on cis and trans regulation in yeasts. *Genome Res* 20(6):826–836. 821
67. Signor SA, Nuzhdin SV (2018) The evolution of gene expression in *cis* and *trans*. *Trends Genet* 34(7):532–544. 822

- 823  
824 68. Buchberger E, Reis M, Lu T-H, Posniern N (2019) Cloudy with a chance of insights: Context dependent gene regulation and implications for evolutionary studies. *Genes* 10(7):492. 872
- 825  
826 69. Chen J, Nolte V, Schlötterer C (2015) Temperature stress mediates decanalization and dominance of gene expression in drosophila melanogaster. *PLoS Genet* 11(2):e1004883. 873
- 827  
828 70. Cubillos FA, et al. (2014) Extensive cis-regulatory variation robust to environmental perturbation in arabidopsis. *Plant Cell* 26(11):4298–4310. 874
- 829  
830 71. Li XC, Fay JC (2017) Cis-regulatory divergence in gene expression between two thermally divergent yeast species. *Genome Biol Evol* 9(5):1120–1129. 875
- 831  
832 72. Ehrenreich IM, Pfennig DW (2016) Genetic assimilation: A review of its potential proximate causes and evolutionary consequences. *Ann Bot* 117(5):769–779. 876
- 833  
834 73. Waddington CH (1942) Canalization of development and the inheritance of acquired characters. *Nature* 150(3811):563–565. 877
- 835  
836 74. Waddington CH (1952) Selection of the genetic basis for an acquired character. *Nature* 169(4302):625–626. 878
- 837  
838 75. Waddington CH (1953) Genetic assimilation of an acquired character. *Evolution* 7(2):118–126. 879
- 839  
840 76. Burg KRL van der, et al. (2020) Genomic architecture of a genetically assimilated seasonal color pattern. *Science* 370(6517):721–725. 880
- 841  
842 77. Ntambi JM, et al. (2002) Loss of stearoyl-CoA desaturase-1 function protects mice against adiposity. *Proc Natl Acad Sci* 99(17):11482–11486. 881
- 843  
844 78. Lee S-H, et al. (2004) Lack of stearoyl-CoA desaturase 1 upregulates basal thermogenesis but causes hypothermia in a cold environment. *J Lipid Res* 45(9):1674–1682. 882
- 845  
846 79. Riddell EA, Patton JL, Beissinger SR (2022) Thermal adaptation of pelage in desert rodents balances cooling and insulation. *Science* (in press). 883
- 847  
848 80. Chen S, Zhou Y, Chen Y, Gu J (2018) Fastp: An ultra-fast all-in-one FASTQ preprocessor. *Bioinformatics* 34(17):i884–i890. 884
- 849  
850 81. Dobin A, et al. (2013) STAR: Ultrafast universal RNA-seq aligner. *Bioinformatics* 29(1):15–21. 885
- 851  
852 82. Anders S, Pyl PT, Huber W (2015) HTSeq—a python framework to work with high-throughput sequencing data. *Bioinformatics* 31(2):166–169. 886
- 853  
854 83. Love MI, Huber W, Anders S (2014) Moderated estimation of fold change and dispersion for RNA-seq data with DESeq2. *Genome Biol* 15(12):550. 887
- 855  
856 84. Mallard F, Jakšić AM, Schlötterer C (2018) Contesting the evidence for non-adaptive plasticity. *Nature* 555(7698):E21–E22. 888
- 857  
858 85. Benjamini Y, Hochberg Y (1995) Controlling the false discovery rate: A practical and powerful approach to multiple testing. *J R Stat Soc Series B Stat Methodol* 57(1):289–300. 889
- 859  
860 86. Langmead B, Salzberg SL (2012) Fast gapped-read alignment with bowtie 2. *Nat Methods* 9(4):357–359. 890
- 861  
862 87. Geijn B van de, McVicker G, Gilad Y, Pritchard JK (2015) WASP: Allele-specific software for robust molecular quantitative trait locus discovery. *Nat Methods* 12(11):1061–1063. 891
- 863  
864 88. Coolon JD, McManus CJ, Stevenson KR, Graveley BR, Wittkopp PJ (2018) Corrigendum: Tempo and mode of regulatory evolution in drosophila. *Genome Res* 28(11):1766. 892
- 865  
866 89. Mack KL, Nachman MW (2017) Gene regulation and speciation. *Trends Genet* 33(1):68–80. 893
- 867  
868 90. Zheng X, et al. (2012) A high-performance computing toolset for relatedness and principal component analysis of SNP data. *Bioinformatics* 28(24):3326–3328. 894
- 869  
870 91. Yi X, et al. (2010) Sequencing of 50 human exomes reveals adaptation to high altitude. *Science* 329(5987):75–78. 895
- 871  
92. Crawford JE, et al. (2017) Natural selection on genes related to cardiovascular health in high-altitude adapted andeans. *Am J Hum Genet* 101(5):752–767. 896
93. Danecek P, et al. (2011) The variant call format and VCFtools. *Bioinformatics* 27(15):2156–2158. 897
94. Malaspinas A-S, et al. (2016) A genomic history of aboriginal australia. *Nature* 538(7624):207–214. 898
95. Quinlan AR, Hall IM (2010) BEDTools: A flexible suite of utilities for comparing genomic features. *Bioinformatics* 26(6):841–842. 899
96. Mi H, Muruganujan A, Thomas PD (2013) PANTHER in 2013: Modeling the evolution of gene function, and other gene attributes, in the context of phylogenetic trees. *Nucleic Acids Res* 41:D377–86. 900
97. Thomas PD, et al. (2003) PANTHER: A library of protein families and subfamilies indexed by function. *Genome Res* 13(9):2129–2141. 901
98. Weng M-P, Liao B-Y (2017) modPhEA: Model organism phenotype enrichment analysis of eukaryotic gene sets. *Bioinformatics* 33(21):3505–3507. 902
